# Supplementary material for: Determination of coordination modes and estimation of the 31P–31P distances in heterogeneous catalyst by solid state double quantum filtered 31P NMR spectroscopy
Source: Royal Society of Chemistry journal article supplement (doi:10.1039/c0cp01191f), 2011-01-01
Supplement: c0cp01191f.pdf [file c0cp01191f.pdf]

## Supporting Information

### **Determination of coordination modes and estimation of the $^{31}\text{P}$ - $^{31}\text{P}$ distances in heterogeneous catalyst by solid state double quantum filtered $^{31}\text{P}$ NMR Spectroscopy**

Si-Yong Zhang<sup>1,2</sup>, Mei-Tao Wang<sup>2</sup>, Qing-Hua Liu<sup>1</sup>, Bing-Wen Hu<sup>1\*</sup>, Qun Chen<sup>1\*</sup>,  
He-Xing Li<sup>2\*</sup>, Jean-Paul Amoureux<sup>3</sup>

1. Physics Department & Shanghai Key Laboratory of Magnetic Resonance, East China Normal University, Shanghai 200062, CHINA
2. Department of Chemistry, Shanghai Normal University, Shanghai 200062, CHINA
3. UCCS, University of Lille1, Villeneuve d'Ascq 59650, FRANCE

Email: [bwhu@phy.ecnu.edu.cn](mailto:bwhu@phy.ecnu.edu.cn), [qchen@ecnu.edu.cn](mailto:qchen@ecnu.edu.cn), [hexing-li@shnu.edu.cn](mailto:hexing-li@shnu.edu.cn)

### CSA line-shape fitting of [1,2-Bis(diphenylphosphino)ethane] dichloropalladium(II)

The experiment was performed at on a Bruker AVANCEIII spectrometer at a magnetic field strength of 14 T with  $^1\text{H}$  frequency of 600.13 MHz and 4mm rotor at spinning frequency of  $4000 \pm 2$  Hz.  $^1\text{H}$  decoupling of 108 kHz was applied. Recycle delay is 55s and the scan number is 100. The pound # in the Fig. S1 denotes the a small amount of  $^{31}\text{P}$  signal indirect-coupled with  $^{105}\text{Pd}$  present to 22.2% having spin  $I=5/2$  and this signal is not used for the fitting here. The  $^1J(^{105}\text{Pd}, ^{31}\text{P})$  was estimated to be 80Hz. The fitting in Fig. S1 gives out the  $\delta_{\text{CSA1}}=-116.73$  ppm,  $\eta_1=0.777$ ,  $\delta_{\text{CSA2}}=-79.53$  ppm and  $\eta_2=0.788$  for a spin-pair. These values were used in SIMPSON simulations in Fig. 2. The home-made fitting program will run the SIMPSON with these CSA parameters and dipolar coupling parameter to simulate the  $F_{\text{DQ}}^{\text{symm}}(d, \tau)$  curve and finally give out the values of the DQ function

$$F_{\text{DQ}}(t) = AF_{\text{DQ}}^{\text{symm}}(d, \tau) \exp(-2\tau / T_{\text{d}}).$$

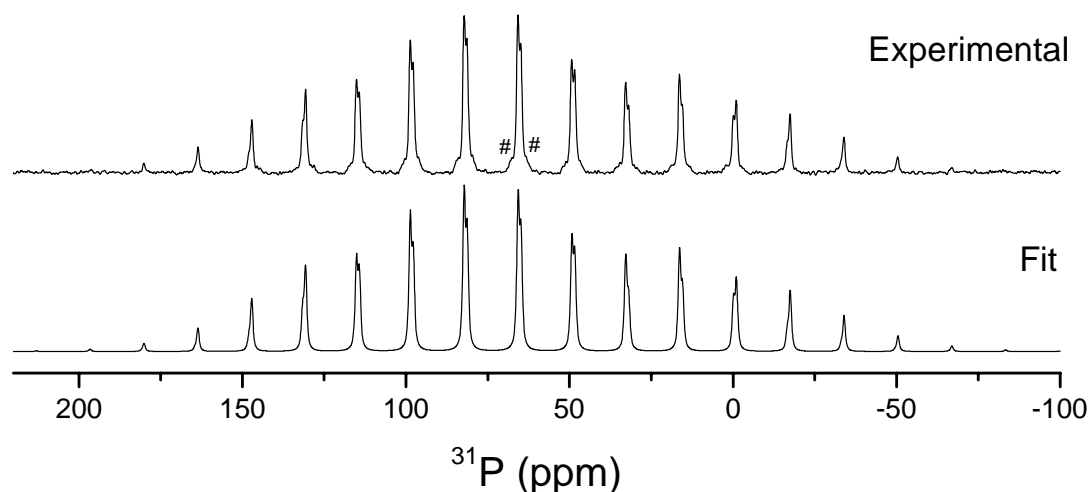

Fig. S1: the fitting of the one-pulse  $^{31}\text{P}$  spectrum of [1,2-Bis(diphenylphosphino)ethane] dichloropalladium(II).

### The effect of $^1J(^{105}\text{Pd}, ^{31}\text{P})$

Palladium system always have a small indirect spin-spin coupling  $^1J(^{105}\text{Pd}, ^{31}\text{P})$  between  $^{105}\text{Pd}$  and  $^{31}\text{P}$ . Thus we have to consider the effect of  $^1J(^{105}\text{Pd}, ^{31}\text{P})$ . The simulation of  $^1J(^{105}\text{Pd}, ^{31}\text{P})=0$  Hz and  $^1J(^{105}\text{Pd}, ^{31}\text{P})=120$  Hz for  $\text{BR}2_2^1$  are shown in Fig. S2(a) and (b), respectively. Obviously, the introduce of  $^1J(^{105}\text{Pd}, ^{31}\text{P})$  will decrease the signal when the build-up time is long. However, in the real system, there is a strong decay due to  $T_2$  factor and a potential lost due to imperfect decoupling of proton channel. So we could introduce the factor  $A \cdot \exp(-2t/T_d)$  here, where  $T_d$  defines the lost due to  $T_2$  and  $A$  the lost due to imperfect decoupling. The Fig. S2(c) and (d) is the result of the multiplication of (a) and (b) with the factor  $A \cdot \exp(-2t/T_d)$  respectively. Now the two curves are more or less overlapped. Meanwhile, only 22.2%  $^{105}\text{Pd}$  has an indirect spin-spin coupling with  $^{31}\text{P}$ , that means, only small part of  $^{31}\text{P}$  should take into account  $^1J(^{105}\text{Pd}, ^{31}\text{P})$  effect (which is obvious in Fig. S1). It should be also mentioned that the quadrupolar coupling constant and the orientation of the EFG tensor have no influence on the build-up curve (overlapped with (a) and (b)). Consequently we could neglect the effect of  $^1J(^{105}\text{Pd}, ^{31}\text{P})$  when dealing with the palladium system.

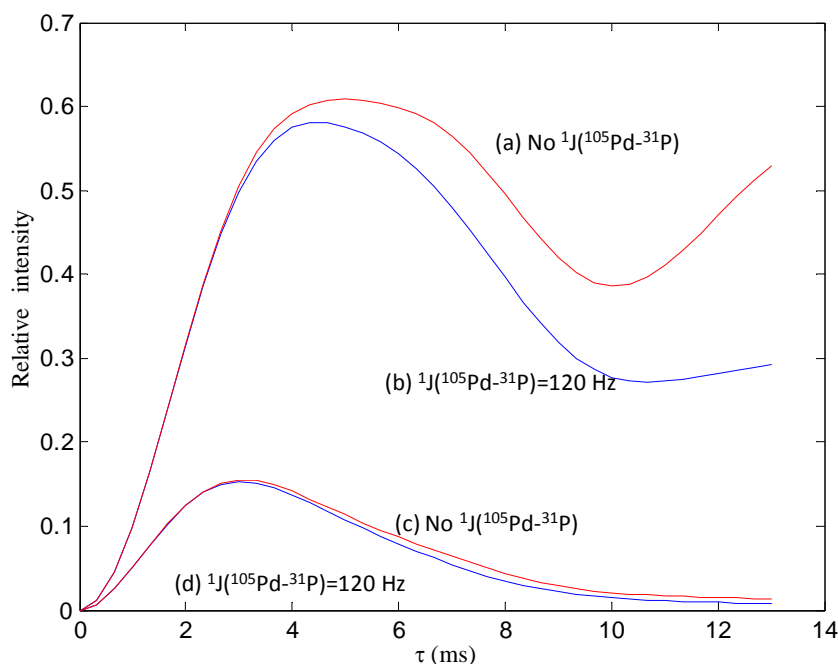

Fig. S2. The build-up curve of  $\text{BR}2_2^1$  simulated by SIMPSON. Two identical  $^{31}\text{P}$  with  $\delta_{\text{CSA}} = 0$  were used. The dipolar coupling between two  $^{31}\text{P}$  is 616 Hz and the  $^1J$

$(^{105}\text{Pd}, ^{31}\text{P}) = 100 \text{ Hz}$ .  $B_0 = 14 \text{ T}$ .  $\nu_R = 12 \text{ kHz}$ . The  $\pi$  pulse length of  $\text{BR2}_2^1$  is  $19.25 \mu\text{s}$ . (c) and (d) is the result of multiplication of (a) and (b) with  $A \cdot \exp(-2t/T_d)$ , respectively.  $A = 0.65$  and  $T_d = 8.0 \text{ ms}$ .

### The deconvolution of one-pulse experiment of Pd-complex

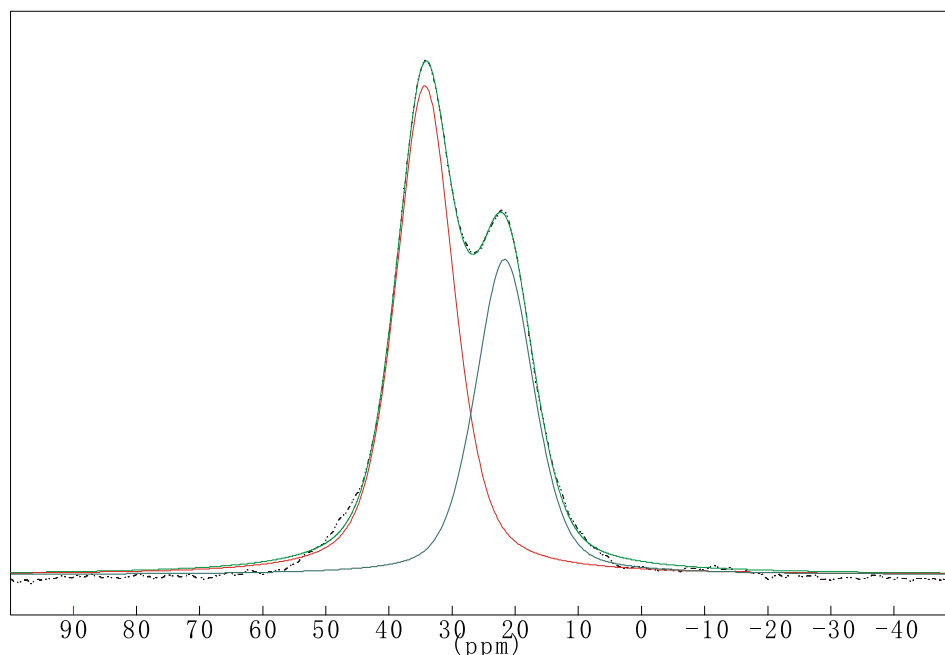

Fig. S3. The deconvolution of one pulse experiment of Pd-complex whose CP version is also shown in Fig. 3b. The black dot line is the experimental data and the green line is the fitting result. A mixture of 60% Gauss and 40% Lorentz line-shape was employed here. The relative proportion of left peak and right peak are 62.8% and 37.2%. Scan number is 1024 and recycle delay is 68 s.  $B_0 = 14 \text{ T}$ ,  $\nu_R = 12 \text{ kHz}$ .
